# Supplementary material for: Source apportionment of NMVOCs in the Kathmandu Valley during the SusKat-ABC international field campaign using positive matrix factorization
Source: Copernicus journal article supplement (doi:10.5194/acp-17-8129-2017), 2017-07-04
Supplement: Supplementary file [file acp-17-8129-2017-supplement.pdf]

Supplement of Atmos. Chem. Phys., 17, 8129–8156, 2017  
<https://doi.org/10.5194/acp-17-8129-2017-supplement>  
© Author(s) 2017. This work is distributed under  
the Creative Commons Attribution 3.0 License.

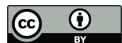

*Supplement of*

## **Source apportionment of NMVOCs in the Kathmandu Valley during the SusKat-ABC international field campaign using positive matrix factorization**

**Chinmoy Sarkar et al.**

*Correspondence to:* Vinayak Sinha ([vsinha@iisermohali.ac.in](mailto:vsinha@iisermohali.ac.in))

The copyright of individual parts of the supplement might differ from the CC BY 3.0 License.

1 **Table S1.** Most likely identity of VOCs (having average mixing ratios > 0.2 ppb) detected at  
 2 specific protonated m/z ratios, molecular formula, likely mass assignment, reference of previous  
 3 mass assignment, sensitivity, limit of detection (LOD), average ambient mixing ratios ( $\pm 1 \sigma$ )

| Protonated m/z or ion | Formula                                      | Most Likely Identity                                     | References of some previously reported studies                  | Sensitivity (ncps/ppb) | LOD (ppb) | Average (sdev) mixing ratio (ppb) |
|-----------------------|----------------------------------------------|----------------------------------------------------------|-----------------------------------------------------------------|------------------------|-----------|-----------------------------------|
| 28.007                | HCN                                          | Hydrogen Cyanide                                         | Stockwell et al., 2015; Karl et al., 2003                       | 18.48                  | 0.241     | 1.56 (0.24)                       |
| 31.018                | HCHO                                         | Formaldehyde                                             | Inomata et al., 2010; Stockwell et al., 2015                    | 18.88                  | 0.103     | 1.78 (0.50)                       |
| 33.034                | CH <sub>3</sub> OH                           | Methanol                                                 | Seco et al., 2011; de Gouw et al., 2003                         | 19.16                  | 0.090     | 7.42 (1.28)                       |
| 41.039                | C <sub>3</sub> H <sub>4</sub>                | Propyne                                                  | Akagi et al., 2011; Stockwell et al., 2015                      | 7.167                  | 0.080     | 7.67 (1.80)                       |
| 42.034                | CH <sub>3</sub> CN                           | Acetonitrile*                                            | Seco et al., 2011; de Gouw et al., 2003                         | 20.91                  | 0.043     | 1.08 (0.38)                       |
| 43.055                | C <sub>3</sub> H <sub>6</sub>                | Propene                                                  | Stockwell et al., 2015; Park et al., 2013                       | 7.45                   | 0.048     | 3.98 (1.21)                       |
| 44.014                | NHCO                                         | Isocyanic acid                                           | Warneke et al., 2011                                            | 20.64                  | 0.067     | 0.90 (0.08)                       |
| 45.033                | C <sub>2</sub> H <sub>4</sub> O              | Acetaldehyde*                                            | De Gouw et al., 2003; Seco et al., 2011                         | 20.04                  | 0.262     | 8.81 (4.58)                       |
| 45.990                | NO <sub>2</sub> <sup>+</sup>                 | Nitronium ion from fragmentation of C1-C5 alkyl nitrates | Aoki et al., 2007                                               | 20.91                  | 0.094     | 1.08 (0.24)                       |
| 46.029                | CH <sub>3</sub> NO                           | Methanamide                                              |                                                                 | 20.91                  | 0.093     | 0.76 (0.16)                       |
| 47.013                | CH <sub>2</sub> O <sub>2</sub>               | Formic acid                                              | Jordan et al., 2009; Williams et al., 2001                      | 21.04                  | 0.041     | 4.96 (1.02)                       |
| 47.049                | C <sub>2</sub> H <sub>6</sub> O              | Ethanol                                                  | Park et al., 2013; Seco et al., 2011                            | 21.05                  | 0.361     | 1.59 (0.85)                       |
| 51.044                | C <sub>4</sub> H <sub>2</sub>                | 1,3-Butadiyne <sup>§</sup>                               | Yokelson et al., 2013                                           | 8.56                   | 0.013     | 0.67 (0.14)                       |
| 56.060                | C <sub>3</sub> H <sub>5</sub> N              | Propanenitrile <sup>§</sup>                              | Yokelson et al., 2013                                           | 22.27                  | 0.022     | 0.21 (0.05)                       |
| 57.034                | C <sub>3</sub> H <sub>4</sub> O              | Acrolein* + Methylketene                                 | Stockwell et al., 2015; Jordan et al., 2009                     | 22.26                  | 0.034     | 0.80 (0.26)                       |
| 59.049                | C <sub>3</sub> H <sub>6</sub> O              | Acetone* + Propanal                                      | de Gouw et al., 2003; Seco et al., 2011                         | 23.47                  | 0.074     | 4.21 (0.65)                       |
| 60.051                | C <sub>2</sub> H <sub>5</sub> NO             | Acetamide                                                |                                                                 | 22.80                  | 0.069     | 0.39 (0.05)                       |
| 61.027                | C <sub>2</sub> H <sub>4</sub> O <sub>2</sub> | Acetic acid                                              | de Gouw et al., 2007; Stockwell et al., 2015; Seco et al., 2011 | 22.94                  | 0.440     | 4.24 (1.21)                       |
| 62.026                | CH <sub>3</sub> NO <sub>2</sub>              | Nitromethane <sup>@</sup>                                | Inomata et al., 2014; Akagi et al., 2013                        | 23.07                  | 0.020     | 0.24 (0.08)                       |
| 63.026                | C <sub>2</sub> H <sub>6</sub> S              | Dimethyl Sulfide                                         | Akagi et al., 2011; Park et al., 2013                           | 23.21                  | 0.049     | 0.26 (0.03)                       |
| 67.054                | C <sub>5</sub> H <sub>6</sub>                | 1,3-Cyclopentadiene                                      | Stockwell et al., 2015                                          | 10.78                  | 0.008     | 0.23 (0.06)                       |
| 69.033                | C <sub>4</sub> H <sub>4</sub> O              | Furan                                                    | Stockwell et al., 2015; Jordan et al., 2009                     | 24.02                  | 0.009     | 0.46 (0.17)                       |
| 69.070                | C <sub>5</sub> H <sub>8</sub>                | Isoprene*                                                | Stockwell et al., 2015; de Gouw et al., 2003; Seco et al., 2011 | 10.02                  | 0.013     | 1.11 (0.24)                       |
| 71.049                | C <sub>4</sub> H <sub>6</sub> O              | Methyl vinyl ketone; Methacrolein; Crotonaldehyde*       | Seco et al., 2011; Stockwell et al., 2015; de Gouw et al., 2007 | 27.17                  | 0.017     | 0.35 (0.10)                       |

|         |                                              |                          |                                                                          |       |       |             |
|---------|----------------------------------------------|--------------------------|--------------------------------------------------------------------------|-------|-------|-------------|
| 73.027  | C <sub>3</sub> H <sub>4</sub> O <sub>2</sub> | Methylglyoxal            | Stockwell et al., 2015; Muller et al., 2012                              | 24.56 | 0.021 | 0.31 (0.10) |
| 73.063  | C <sub>4</sub> H <sub>8</sub> O              | Methyl ethyl ketone*     | de Gouw et al., 2003; Stockwell et al., 2015; Park et al., 2013          | 21.91 | 0.036 | 0.69 (0.12) |
| 75.042  | C <sub>3</sub> H <sub>6</sub> O <sub>2</sub> | Hydroxyacetone           | Christian et al., 2003; Heigenmoser et al., 2013; Stockwell et al., 2015 | 24.83 | 0.066 | 0.63 (0.18) |
| 79.054  | C <sub>6</sub> H <sub>6</sub>                | Benzene*                 | Jordan et al., 2009; de Gouw et al., 2003                                | 13.43 | 0.013 | 2.71 (1.17) |
| 83.085  | C <sub>6</sub> H <sub>10</sub>               | Assorted Hydrocarbons    | Stockwell et al., 2015                                                   | 13.01 | 0.008 | 0.45 (0.09) |
| 87.042  | C <sub>4</sub> H <sub>6</sub> O <sub>2</sub> | 2,3-Butanedione          | Stockwell et al., 2015; Karl et al., 2007                                | 26.45 | 0.028 | 0.35 (0.08) |
| 93.070  | C <sub>7</sub> H <sub>8</sub>                | Toluene*                 | Seco et al., 2011; Jordan et al., 2009                                   | 15.78 | 0.006 | 1.53 (0.38) |
| 97.031  | C <sub>5</sub> H <sub>4</sub> O <sub>2</sub> | 2-Furaldehyde (furfural) | Ruuskanen et al., 2011; Liu et al., 2012; Li et al., 2013                | 27.80 | 0.010 | 0.26 (0.07) |
| 97.102  | C <sub>7</sub> H <sub>12</sub>               | Assorted Hydrocarbons    | Stockwell et al., 2015                                                   | 14.96 | 0.006 | 0.23 (0.05) |
| 105.070 | C <sub>8</sub> H <sub>8</sub>                | Styrene                  | Jordan et al., 2009; Stockwell et al., 2015                              | 16.07 | 0.004 | 0.21 (0.08) |
| 107.086 | C <sub>8</sub> H <sub>10</sub>               | Xylenes*                 | Jordan et al., 2009; Stockwell et al., 2015                              | 15.36 | 0.004 | 0.97 (0.27) |
| 121.101 | C <sub>9</sub> H <sub>12</sub>               | Trimethylbenzenes        | Muller et al., 2012; Jordan et al., 2009                                 | 18.30 | 0.004 | 0.38 (0.10) |
| 129.070 | C <sub>10</sub> H <sub>8</sub>               | Naphthalene              | Jordan et al., 2009; Stockwell et al., 2015                              | 19.40 | 0.009 | 0.33 (0.09) |

1 \* VOC sensitivities determined using VOC gas standards in calibration experiments

2 § Observed mass accuracy for 1,3-Butadiene and Propanenitrile were 21 mDa and 10 mDa, respectively

3 @ Corrected for the <sup>13</sup>C isotopologues of acetic acid

4

5

1

2 **Table S2.** Statistical parameters for the measured species used as PMF input

| VOC Species                        | Category | S/N  | Min  | 25th | Median | 75 <sup>th</sup> | Max   | N <sup>1</sup> | Nbdl <sup>2</sup> |
|------------------------------------|----------|------|------|------|--------|------------------|-------|----------------|-------------------|
| Hydrogen Cyanide                   | Weak     | 3.10 | 0.29 | 0.62 | 0.90   | 1.79             | 12.43 | 969            | 0                 |
| Formaldehyde                       | Strong   | 3.93 | 0.60 | 1.43 | 1.80   | 2.34             | 5.39  | 969            | 0                 |
| Methanol                           | Strong   | 4.00 | 3.31 | 6.69 | 8.51   | 10.32            | 21.79 | 969            | 0                 |
| Propyne                            | Strong   | 4.00 | 3.37 | 8.27 | 10.95  | 13.73            | 37.58 | 969            | 0                 |
| Acetonitrile                       | Strong   | 3.95 | 0.50 | 1.00 | 1.47   | 2.04             | 5.60  | 969            | 0                 |
| Propene                            | Strong   | 4.00 | 1.37 | 3.99 | 6.03   | 7.78             | 18.34 | 969            | 0                 |
| Isocyanic acid                     | Strong   | 3.91 | 0.94 | 1.22 | 1.36   | 1.61             | 2.39  | 969            | 0                 |
| Acetaldehyde                       | Strong   | 3.97 | 3.46 | 8.83 | 11.52  | 15.46            | 61.96 | 969            | 0                 |
| Nitronium ion                      | Strong   | 3.86 | 0.81 | 1.37 | 1.65   | 1.97             | 5.42  | 969            | 0                 |
| Formamide                          | Strong   | 3.71 | 0.55 | 0.93 | 1.20   | 1.51             | 2.67  | 969            | 0                 |
| Formic acid                        | Strong   | 4.00 | 2.42 | 6.85 | 7.92   | 9.61             | 17.74 | 969            | 0                 |
| Ethanol                            | Strong   | 2.78 | bdl  | 1.16 | 2.21   | 3.49             | 18.63 | 969            | 51                |
| 1,3-Butadiyne                      | Strong   | 3.99 | 0.13 | 0.89 | 1.20   | 1.51             | 3.43  | 969            | 0                 |
| Propanenitrile                     | Strong   | 3.77 | 0.09 | 0.32 | 0.40   | 0.50             | 0.98  | 969            | 0                 |
| Acrolein + Methylketene            | Strong   | 3.95 | 0.40 | 1.14 | 1.51   | 2.06             | 4.09  | 969            | 0                 |
| Acetone + Propanal                 | Strong   | 3.99 | 3.55 | 6.99 | 8.71   | 10.38            | 23.48 | 969            | 0                 |
| Acetamide                          | Strong   | 3.53 | 0.51 | 0.69 | 0.82   | 0.97             | 1.53  | 969            | 0                 |
| Acetic acid                        | Strong   | 3.88 | 4.69 | 9.31 | 11.99  | 15.56            | 35.04 | 969            | 0                 |
| Nitromethane                       | Strong   | 3.83 | 0.16 | 0.37 | 0.50   | 0.69             | 1.85  | 969            | 0                 |
| Dimethyl Sulfide                   | Strong   | 3.46 | 0.19 | 0.50 | 0.56   | 0.63             | 2.35  | 969            | 0                 |
| 1,3-Cyclopentadiene                | Strong   | 3.97 | 0.14 | 0.36 | 0.50   | 0.70             | 4.42  | 969            | 0                 |
| Furan                              | Strong   | 3.98 | 0.19 | 0.66 | 1.14   | 1.52             | 3.38  | 969            | 0                 |
| Isoprene                           | Strong   | 4.00 | 0.28 | 1.76 | 2.39   | 3.43             | 11.25 | 969            | 0                 |
| Methyl vinyl Ketone + Methacrolein | Strong   | 3.94 | 0.18 | 0.61 | 0.81   | 1.11             | 3.08  | 969            | 0                 |
| Methylglyoxal                      | Strong   | 3.89 | 0.18 | 0.56 | 0.76   | 1.01             | 2.27  | 969            | 0                 |
| Methyl ethyl ketone                | Strong   | 3.93 | 0.37 | 1.30 | 1.73   | 2.18             | 4.93  | 969            | 0                 |
| Hydroxyacetone                     | Strong   | 3.74 | 0.27 | 1.17 | 1.54   | 2.15             | 4.47  | 969            | 0                 |
| Benzene                            | Strong   | 4.00 | 0.95 | 3.98 | 6.79   | 10.11            | 37.35 | 969            | 0                 |
| Assorted Hydrocarbons              | Strong   | 3.99 | 0.10 | 0.78 | 1.10   | 1.66             | 6.88  | 969            | 0                 |
| 2,3-Butanedione                    | Strong   | 3.86 | 0.16 | 0.80 | 1.04   | 1.36             | 3.35  | 969            | 0                 |
| Toluene                            | Strong   | 4.00 | 0.51 | 3.09 | 4.51   | 6.54             | 30.71 | 969            | 0                 |
| 2-Furaldehyde (furfural)           | Strong   | 3.96 | 0.18 | 0.61 | 0.83   | 1.15             | 2.23  | 969            | 0                 |
| Assorted Hydrocarbons              | Strong   | 3.97 | 0.08 | 0.48 | 0.70   | 1.03             | 3.03  | 969            | 0                 |
| Styrene                            | Strong   | 3.98 | 0.09 | 0.41 | 0.67   | 1.06             | 3.32  | 969            | 0                 |
| Xylenes                            | Strong   | 4.00 | 0.31 | 2.12 | 3.19   | 4.79             | 24.73 | 969            | 0                 |
| Trimethylbenzenes                  | Strong   | 3.99 | 0.17 | 0.94 | 1.39   | 2.14             | 10.44 | 969            | 0                 |
| Naphthalene                        | Strong   | 3.97 | 0.28 | 0.92 | 1.44   | 2.00             | 6.94  | 969            | 0                 |

3 1. Number of valid hourly VOC samples; 2. Number of samples below detection limit

4

5

6

1 **Table S3:** Percentage contribution of PMF derived factors obtained from constrained runs with  
 2 5-, 6-, 7-, 8- and 9-Factors

| <b>PMF solutions</b> | <b>RB + WD</b> | <b>BK</b> | <b>BK2</b> | <b>MCS</b> | <b>TR</b> | <b>MI</b> | <b>UI</b> | <b>BG</b> | <b>MD</b> | <b>SE</b> |
|----------------------|----------------|-----------|------------|------------|-----------|-----------|-----------|-----------|-----------|-----------|
| 5-Factor             | 19.2           | 23.7      | -          | 23.9       | -         | -         | -         | 13.4      | 19.8      | -         |
| 6-Factor             | 15.6           | 18.4      | -          | -          | 20.1      | 21.5      | -         | 11.7      | 12.7      | -         |
| 7-Factor             | 12.3           | 14.7      | -          | -          | 17        | 19.5      | -         | 8.2       | 13.8      | 14.7      |
| 8-Factor             | 10.9           | 10.4      | -          | -          | 16.8      | 14        | 17.9      | 10        | 9.2       | 10.8      |
| 9-Factor             | 10.5           | 12.2      | 7.7        | -          | 15.6      | 9.5       | 15.5      | 7         | 9.8       | 12.2      |

3 RB + WD = Residential biofuel use and waste disposal; BK = Biomass co-fired brick kilns; BK2 = Second brick kiln  
 4 factor; MCS = Mixed combustion sources; TR = Traffic; MI = Mixed industrial; UI = Unresolved industrial; BG =  
 5 Biogenic; MD = Mixed daytime; SE = Solvent evaporation

6

7

8

9

10

11

12

13

14

15

16

17

1 **Table S4.** Correlation coefficient (r) between the time series of PMF resolved factors and other  
 2 independent meteorological parameters (solar radiation, ambient temperature, change in solar  
 3 radiation, change in ambient temperature, wind speed, wind direction, relative humidity and  
 4 absolute humidity) for a) daytime period (06:00 – 17:00 LT) and b) nighttime period (17:00 –  
 5 06:00 LT)

| a)    | SE          | MD          | BG          | RB+WD       | BK          | MI          | UI    | TR    | SR          | AT          | ΔSR         | ΔAT   | WS    | RH   | AH   |
|-------|-------------|-------------|-------------|-------------|-------------|-------------|-------|-------|-------------|-------------|-------------|-------|-------|------|------|
| SE    | 1.00        | -           |             |             |             |             |       |       |             |             |             |       |       |      |      |
| MD    | -0.22       | 1.00        | -           |             |             |             |       |       |             |             |             |       |       |      |      |
| BG    | -0.01       | -0.01       | 1.00        | -           |             |             |       |       |             |             |             |       |       |      |      |
| RB+WD | -0.01       | -0.35       | 0.10        | 1.00        | -           |             |       |       |             |             |             |       |       |      |      |
| BK    | 0.23        | -0.55       | -0.31       | 0.18        | 1.00        | -           |       |       |             |             |             |       |       |      |      |
| MI    | 0.07        | -0.68       | -0.28       | <b>0.51</b> | <b>0.54</b> | 1.00        | -     |       |             |             |             |       |       |      |      |
| UI    | <b>0.55</b> | -0.49       | -0.17       | -0.24       | 0.37        | 0.06        | 1.00  | -     |             |             |             |       |       |      |      |
| TR    | 0.05        | -0.33       | 0.27        | 0.21        | -0.19       | 0.17        | -0.02 | 1.00  | -           |             |             |       |       |      |      |
| SR    | 0.23        | <b>0.58</b> | <b>0.57</b> | -0.35       | -0.51       | -0.65       | -0.16 | -0.10 | 1.00        | -           |             |       |       |      |      |
| AT    | -0.11       | <b>0.74</b> | 0.31        | -0.41       | -0.74       | -0.79       | -0.23 | -0.07 | <b>0.71</b> | 1.00        | -           |       |       |      |      |
| ΔSR   | <b>0.62</b> | -0.47       | 0.15        | 0.14        | 0.38        | 0.29        | 0.46  | -0.08 | 0.11        | -0.46       | 1.00        | -     |       |      |      |
| ΔAT   | <b>0.64</b> | -0.06       | 0.33        | -0.06       | 0.03        | -0.07       | 0.28  | -0.04 | <b>0.50</b> | 0.02        | <b>0.67</b> | 1.00  | -     |      |      |
| WS    | -0.35       | <b>0.57</b> | -0.05       | -0.23       | -0.50       | -0.48       | -0.39 | 0.00  | 0.13        | <b>0.63</b> | -0.71       | -0.45 | 1.00  | -    |      |
| RH    | 0.10        | -0.82       | -0.31       | 0.42        | <b>0.65</b> | <b>0.74</b> | 0.37  | 0.10  | -0.75       | -0.91       | 0.45        | -0.05 | -0.62 | 1.00 | -    |
| AH    | 0.21        | -0.27       | 0.08        | 0.02        | -0.17       | -0.11       | 0.49  | 0.11  | -0.02       | 0.13        | 0.20        | 0.16  | -0.11 | 0.25 | 1.00 |
| b)    | SE          | MD          | BG          | RB+WD       | BK          | MI          | UI    | TR    | SR          | AT          | ΔSR         | ΔAT   | WS    | RH   | AH   |
| SE    | 1.00        | -           |             |             |             |             |       |       |             |             |             |       |       |      |      |
| MD    | 0.14        | 1.00        | -           |             |             |             |       |       |             |             |             |       |       |      |      |
| BG    | -0.25       | -0.18       | 1.00        | -           |             |             |       |       |             |             |             |       |       |      |      |
| RB+WD | 0.34        | -0.10       | <b>0.58</b> | 1.00        | -           |             |       |       |             |             |             |       |       |      |      |
| BK    | -0.20       | -0.38       | -0.07       | -0.33       | 1.00        | -           |       |       |             |             |             |       |       |      |      |
| MI    | -0.25       | -0.60       | 0.08        | 0.04        | 0.32        | 1.00        | -     |       |             |             |             |       |       |      |      |
| UI    | 0.29        | -0.29       | -0.58       | -0.47       | 0.38        | -0.03       | 1.00  | -     |             |             |             |       |       |      |      |
| TR    | 0.17        | -0.36       | 0.36        | 0.46        | -0.24       | 0.14        | -0.24 | 1.00  | -           |             |             |       |       |      |      |
| SR    | 0.10        | 0.11        | 0.05        | -0.04       | -0.17       | -0.28       | -0.01 | 0.32  | 1.00        | -           |             |       |       |      |      |
| AT    | 0.47        | 0.36        | 0.15        | 0.48        | -0.59       | -0.58       | -0.18 | 0.37  | 0.44        | 1.00        | -           |       |       |      |      |
| ΔSR   | -0.17       | -0.22       | -0.03       | -0.02       | 0.25        | 0.38        | 0.04  | -0.34 | -0.83       | -0.59       | 1.00        | -     |       |      |      |
| ΔAT   | -0.12       | 0.00        | -0.06       | -0.21       | 0.09        | 0.08        | 0.08  | -0.11 | -0.09       | -0.14       | 0.21        | 1.00  | -     |      |      |
| WS    | 0.30        | 0.43        | -0.02       | 0.07        | -0.35       | -0.53       | -0.09 | 0.15  | <b>0.55</b> | <b>0.70</b> | -0.78       | -0.15 | 1.00  | -    |      |
| RH    | -0.59       | -0.49       | -0.07       | -0.44       | 0.40        | 0.48        | 0.25  | -0.26 | -0.44       | -0.80       | <b>0.59</b> | 0.16  | -0.66 | 1.00 | -    |
| AH    | 0.04        | -0.06       | 0.18        | 0.26        | -0.43       | -0.33       | 0.03  | 0.21  | 0.05        | 0.55        | -0.08       | -0.05 | 0.21  | 0.04 | 1.00 |

6 SE = Solvent evaporation; MD = Mixed daytime; BG = Biogenic; RB+WD = Residential biofuel use and waste disposal; BK = Biomass co-fired  
 7 brick kilns; MI = Mixed industrial emissions; UI = Unresolved industrial emissions; TR = Traffic; SR = Solar radiation; AT = Ambient temperature;  
 8 ΔSR = Rate of change in solar radiation (dSR/dt); ΔAT = Rate of change in ambient temperature (dT/dt); WS = Wind speed; RH = Relative  
 9 humidity; AH = Absolute humidity

1 **Table S5.** Correlation coefficient (r) between the time series of the input parameters for the PMF model

|          | m28.007 | m31.018 | m33.034 | m41.039 | m42.034 | m43.055 | m44.014 | m45.033 | m45.990 | m46.029 | m47.013 | m47.049 | m51.044 | m56.060 | m57.034 | m59.049 | m60.051 | m61.027 | m62.026 | m63.026 | m67.054 | m69.033 | m69.070 | m71.049 | m73.027 | m73.063 | m75.042 | m79.054 | m83.085 | m87.042 | m93.070 | m97.031 | m97.102 | m105.070 | m107.086 | m121.101 | m129.070 |  |  |  |  |  |  |
|----------|---------|---------|---------|---------|---------|---------|---------|---------|---------|---------|---------|---------|---------|---------|---------|---------|---------|---------|---------|---------|---------|---------|---------|---------|---------|---------|---------|---------|---------|---------|---------|---------|---------|----------|----------|----------|----------|--|--|--|--|--|--|
| m28.007  | 1.00    |         |         |         |         |         |         |         |         |         |         |         |         |         |         |         |         |         |         |         |         |         |         |         |         |         |         |         |         |         |         |         |         |          |          |          |          |  |  |  |  |  |  |
| m31.018  | 0.04    | 1.00    |         |         |         |         |         |         |         |         |         |         |         |         |         |         |         |         |         |         |         |         |         |         |         |         |         |         |         |         |         |         |         |          |          |          |          |  |  |  |  |  |  |
| m33.034  | 0.16    | 0.35    | 1.00    |         |         |         |         |         |         |         |         |         |         |         |         |         |         |         |         |         |         |         |         |         |         |         |         |         |         |         |         |         |         |          |          |          |          |  |  |  |  |  |  |
| m41.039  | 0.25    | 0.24    | 0.79    | 1.00    |         |         |         |         |         |         |         |         |         |         |         |         |         |         |         |         |         |         |         |         |         |         |         |         |         |         |         |         |         |          |          |          |          |  |  |  |  |  |  |
| m42.034  | 0.09    | 0.06    | 0.79    | 0.65    | 1.00    |         |         |         |         |         |         |         |         |         |         |         |         |         |         |         |         |         |         |         |         |         |         |         |         |         |         |         |         |          |          |          |          |  |  |  |  |  |  |
| m43.055  | 0.17    | 0.18    | 0.84    | 0.93    | 0.78    | 1.00    |         |         |         |         |         |         |         |         |         |         |         |         |         |         |         |         |         |         |         |         |         |         |         |         |         |         |         |          |          |          |          |  |  |  |  |  |  |
| m44.014  | -0.02   | 0.55    | 0.23    | -0.01   | 0.27    | 0.03    | 1.00    |         |         |         |         |         |         |         |         |         |         |         |         |         |         |         |         |         |         |         |         |         |         |         |         |         |         |          |          |          |          |  |  |  |  |  |  |
| m45.033  | 0.04    | 0.72    | 0.52    | 0.37    | 0.44    | 0.39    | 0.51    | 1.00    |         |         |         |         |         |         |         |         |         |         |         |         |         |         |         |         |         |         |         |         |         |         |         |         |         |          |          |          |          |  |  |  |  |  |  |
| m45.990  | -0.19   | 0.65    | 0.05    | -0.24   | -0.13   | -0.18   | 0.51    | 0.37    | 1.00    |         |         |         |         |         |         |         |         |         |         |         |         |         |         |         |         |         |         |         |         |         |         |         |         |          |          |          |          |  |  |  |  |  |  |
| m46.029  | -0.22   | 0.60    | 0.09    | -0.22   | 0.12    | -0.14   | 0.85    | 0.59    | 0.69    | 1.00    |         |         |         |         |         |         |         |         |         |         |         |         |         |         |         |         |         |         |         |         |         |         |         |          |          |          |          |  |  |  |  |  |  |
| m47.013  | -0.09   | 0.77    | 0.03    | -0.14   | -0.18   | -0.16   | 0.54    | 0.52    | 0.70    | 0.65    | 1.00    |         |         |         |         |         |         |         |         |         |         |         |         |         |         |         |         |         |         |         |         |         |         |          |          |          |          |  |  |  |  |  |  |
| m47.049  | 0.15    | 0.15    | 0.65    | 0.66    | 0.70    | 0.73    | 0.05    | 0.43    | -0.22   | -0.04   | -0.20   | 1.00    |         |         |         |         |         |         |         |         |         |         |         |         |         |         |         |         |         |         |         |         |         |          |          |          |          |  |  |  |  |  |  |
| m51.044  | 0.09    | 0.36    | 0.90    | 0.73    | 0.64    | 0.80    | 0.12    | 0.48    | 0.10    | 0.05    | 0.14    | 0.54    | 1.00    |         |         |         |         |         |         |         |         |         |         |         |         |         |         |         |         |         |         |         |         |          |          |          |          |  |  |  |  |  |  |
| m56.060  | 0.15    | 0.36    | 0.84    | 0.88    | 0.71    | 0.91    | 0.18    | 0.47    | -0.02   | 0.02    | 0.03    | 0.63    | 0.86    | 1.00    |         |         |         |         |         |         |         |         |         |         |         |         |         |         |         |         |         |         |         |          |          |          |          |  |  |  |  |  |  |
| m57.034  | 0.15    | 0.55    | 0.81    | 0.80    | 0.64    | 0.81    | 0.25    | 0.64    | 0.06    | 0.11    | 0.18    | 0.59    | 0.82    | 0.87    | 1.00    |         |         |         |         |         |         |         |         |         |         |         |         |         |         |         |         |         |         |          |          |          |          |  |  |  |  |  |  |
| m59.049  | 0.17    | 0.58    | 0.68    | 0.70    | 0.45    | 0.66    | 0.22    | 0.68    | 0.24    | 0.13    | 0.38    | 0.42    | 0.74    | 0.75    | 0.79    | 1.00    |         |         |         |         |         |         |         |         |         |         |         |         |         |         |         |         |         |          |          |          |          |  |  |  |  |  |  |
| m60.051  | -0.09   | 0.64    | 0.24    | 0.03    | 0.13    | 0.05    | 0.82    | 0.48    | 0.68    | 0.80    | 0.68    | -0.05   | 0.26    | 0.28    | 0.29    | 0.46    | 1.00    |         |         |         |         |         |         |         |         |         |         |         |         |         |         |         |         |          |          |          |          |  |  |  |  |  |  |
| m61.027  | 0.01    | 0.86    | 0.50    | 0.32    | 0.26    | 0.31    | 0.58    | 0.82    | 0.53    | 0.57    | 0.75    | 0.19    | 0.53    | 0.46    | 0.69    | 0.69    | 0.63    | 1.00    |         |         |         |         |         |         |         |         |         |         |         |         |         |         |         |          |          |          |          |  |  |  |  |  |  |
| m62.026  | 0.08    | 0.30    | 0.80    | 0.65    | 0.91    | 0.76    | 0.38    | 0.66    | 0.02    | 0.25    | 0.09    | 0.70    | 0.68    | 0.72    | 0.76    | 0.61    | 0.25    | 0.54    | 1.00    |         |         |         |         |         |         |         |         |         |         |         |         |         |         |          |          |          |          |  |  |  |  |  |  |
| m63.026  | 0.09    | 0.52    | 0.61    | 0.53    | 0.54    | 0.60    | 0.33    | 0.65    | 0.20    | 0.30    | 0.39    | 0.52    | 0.65    | 0.66    | 0.64    | 0.69    | 0.38    | 0.58    | 0.70    | 1.00    |         |         |         |         |         |         |         |         |         |         |         |         |         |          |          |          |          |  |  |  |  |  |  |
| m67.054  | 0.21    | 0.27    | 0.53    | 0.75    | 0.39    | 0.65    | 0.00    | 0.34    | -0.14   | -0.18   | 0.07    | 0.43    | 0.51    | 0.63    | 0.65    | 0.67    | 0.11    | 0.35    | 0.46    | 0.43    | 1.00    |         |         |         |         |         |         |         |         |         |         |         |         |          |          |          |          |  |  |  |  |  |  |
| m69.033  | 0.22    | 0.13    | 0.77    | 0.90    | 0.73    | 0.90    | -0.04   | 0.29    | -0.34   | -0.25   | -0.25   | 0.68    | 0.70    | 0.85    | 0.81    | 0.60    | -0.02   | 0.24    | 0.69    | 0.50    | 0.66    | 1.00    |         |         |         |         |         |         |         |         |         |         |         |          |          |          |          |  |  |  |  |  |  |
| m69.070  | 0.19    | 0.53    | 0.37    | 0.51    | 0.03    | 0.37    | 0.03    | 0.46    | 0.15    | -0.05   | 0.46    | 0.15    | 0.46    | 0.46    | 0.55    | 0.79    | 0.27    | 0.56    | 0.23    | 0.49    | 0.70    | 0.34    | 1.00    |         |         |         |         |         |         |         |         |         |         |          |          |          |          |  |  |  |  |  |  |
| m71.049  | 0.17    | 0.56    | 0.70    | 0.78    | 0.46    | 0.73    | 0.16    | 0.61    | 0.03    | 0.01    | 0.24    | 0.47    | 0.75    | 0.81    | 0.95    | 0.86    | 0.28    | 0.68    | 0.61    | 0.62    | 0.73    | 0.75    | 0.73    | 1.00    |         |         |         |         |         |         |         |         |         |          |          |          |          |  |  |  |  |  |  |
| m73.027  | -0.02   | 0.84    | 0.35    | 0.33    | 0.00    | 0.27    | 0.36    | 0.55    | 0.48    | 0.36    | 0.70    | 0.06    | 0.50    | 0.48    | 0.65    | 0.67    | 0.57    | 0.83    | 0.24    | 0.49    | 0.40    | 0.26    | 0.66    | 0.73    | 1.00    |         |         |         |         |         |         |         |         |          |          |          |          |  |  |  |  |  |  |
| m73.063  | 0.21    | 0.66    | 0.64    | 0.70    | 0.33    | 0.63    | 0.17    | 0.62    | 0.26    | 0.08    | 0.41    | 0.38    | 0.71    | 0.72    | 0.79    | 0.95    | 0.42    | 0.70    | 0.50    | 0.64    | 0.65    | 0.59    | 0.83    | 0.87    | 0.75    | 1.00    |         |         |         |         |         |         |         |          |          |          |          |  |  |  |  |  |  |
| m75.042  | 0.17    | 0.74    | 0.60    | 0.57    | 0.26    | 0.52    | 0.22    | 0.60    | 0.30    | 0.16    | 0.50    | 0.28    | 0.69    | 0.66    | 0.84    | 0.79    | 0.41    | 0.82    | 0.45    | 0.56    | 0.55    | 0.54    | 0.72    | 0.87    | 0.86    | 0.87    | 1.00    |         |         |         |         |         |         |          |          |          |          |  |  |  |  |  |  |
| m79.054  | 0.20    | 0.01    | 0.73    | 0.70    | 0.89    | 0.78    | 0.10    | 0.36    | -0.18   | -0.05   | -0.22   | 0.64    | 0.59    | 0.69    | 0.62    | 0.51    | 0.05    | 0.19    | 0.82    | 0.50    | 0.51    | 0.76    | 0.17    | 0.50    | -0.01   | 0.41    | 0.28    | 1.00    |         |         |         |         |         |          |          |          |          |  |  |  |  |  |  |
| m83.085  | 0.16    | 0.46    | 0.32    | 0.48    | -0.01   | 0.35    | -0.03   | 0.39    | 0.10    | -0.12   | 0.41    | 0.13    | 0.44    | 0.44    | 0.51    | 0.78    | 0.23    | 0.50    | 0.18    | 0.47    | 0.67    | 0.33    | 0.98    | 0.71    | 0.64    | 0.80    | 0.66    | 0.12    | 1.00    |         |         |         |         |          |          |          |          |  |  |  |  |  |  |
| m87.042  | 0.13    | 0.66    | 0.52    | 0.60    | 0.17    | 0.52    | 0.14    | 0.45    | 0.22    | 0.04    | 0.49    | 0.24    | 0.65    | 0.65    | 0.78    | 0.78    | 0.38    | 0.71    | 0.36    | 0.56    | 0.64    | 0.56    | 0.79    | 0.87    | 0.87    | 0.86    | 0.93    | 0.22    | 0.78    | 1.00    |         |         |         |          |          |          |          |  |  |  |  |  |  |
| m93.070  | 0.17    | 0.28    | 0.62    | 0.77    | 0.37    | 0.74    | -0.08   | 0.23    | -0.01   | -0.23   | 0.07    | 0.37    | 0.69    | 0.73    | 0.67    | 0.76    | 0.16    | 0.35    | 0.45    | 0.54    | 0.74    | 0.68    | 0.67    | 0.75    | 0.50    | 0.78    | 0.62    | 0.52    | 0.69    | 0.72    | 1.00    |         |         |          |          |          |          |  |  |  |  |  |  |
| m97.031  | 0.17    | 0.70    | 0.61    | 0.65    | 0.37    | 0.58    | 0.27    | 0.63    | 0.13    | 0.15    | 0.39    | 0.39    | 0.61    | 0.68    | 0.86    | 0.77    | 0.39    | 0.75    | 0.54    | 0.57    | 0.63    | 0.66    | 0.69    | 0.89    | 0.76    | 0.83    | 0.91    | 0.39    | 0.64    | 0.89    | 0.60    | 1.00    |         |          |          |          |          |  |  |  |  |  |  |
| m97.102  | 0.23    | 0.52    | 0.38    | 0.55    | 0.03    | 0.42    | -0.02   | 0.43    | 0.09    | -0.12   | 0.42    | 0.18    | 0.49    | 0.50    | 0.58    | 0.81    | 0.24    | 0.54    | 0.23    | 0.50    | 0.71    | 0.41    | 0.98    | 0.76    | 0.68    | 0.86    | 0.75    | 0.17    | 0.97    | 0.84    | 0.74    | 0.73    | 1.00    |          |          |          |          |  |  |  |  |  |  |
| m105.070 | 0.23    | 0.18    | 0.64    | 0.86    | 0.52    | 0.82    | -0.10   | 0.22    | -0.27   | -0.31   | -0.15   | 0.49    | 0.64    | 0.79    | 0.76    | 0.66    | 0.02    | 0.26    | 0.52    | 0.43    | 0.75    | 0.87    | 0.51    | 0.79    | 0.39    | 0.67    | 0.59    | 0.66    | 0.51    | 0.66    | 0.85    | 0.67    | 0.59    | 1.00     |          |          |          |  |  |  |  |  |  |
| m107.086 | 0.15    | 0.27    | 0.54    | 0.71    | 0.25    | 0.67    | -0.12   | 0.15    | -0.01   | -0.27   | 0.07    | 0.28    | 0.62    | 0.66    | 0.61    | 0.69    | 0.13    | 0.32    | 0.32    | 0.40    | 0.68    | 0.61    | 0.64    | 0.70    | 0.51    | 0.74    | 0.61    | 0.40    | 0.67    | 0.71    | 0.97    | 0.57    | 0.73    | 0.81     | 1.00     |          |          |  |  |  |  |  |  |
| m121.101 | 0.16    | 0.22    | 0.51    | 0.73    | 0.24    | 0.67    | -0.16   | 0.12    | -0.10   | -0.33   | 0.03    | 0.30    | 0.60    | 0.65    | 0.59    | 0.68    | 0.08    | 0.27    | 0.31    | 0.40    | 0.69    | 0.64    | 0.64    | 0.69    | 0.48    | 0.72    | 0.58    | 0.39    | 0.68    | 0.71    | 0.96    | 0.57    | 0.73    | 0.84     | 0.99     | 1.00     |          |  |  |  |  |  |  |
| m129.070 | 0.29    | 0.28    | 0.63    | 0.73    | 0.61    | 0.71    | 0.02    | 0.48    | -0.12   | -0.10   | 0.06    | 0.54    | 0.60    | 0.69    | 0.68    | 0.75    | 0.14    | 0.39    | 0.68    | 0.63    | 0.71    | 0.72    | 0.59    | 0.71    | 0.32    | 0.71    | 0.56    | 0.81    | 0.56    | 0.57    | 0.71    | 0.65    | 0.62    | 0.76     | 0.59     | 0.61     | 1.00     |  |  |  |  |  |  |

2

3

1

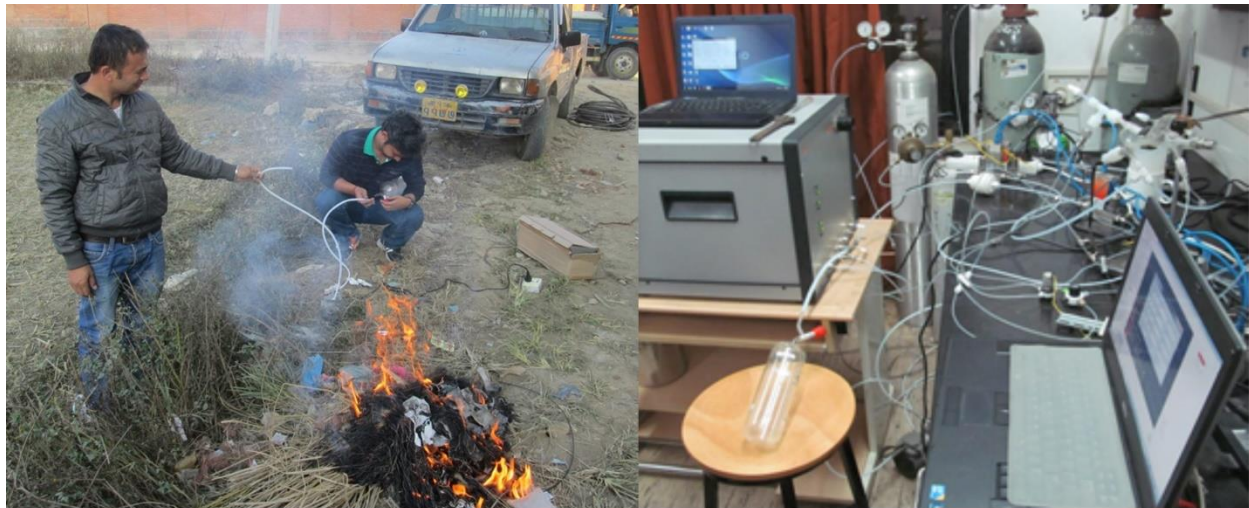

2

3 **Figure S1.** Collection of garbage burning grab samples in the Kathmandu Valley (on left) and the  
4 instrumental setup for the analysis (on right)

5

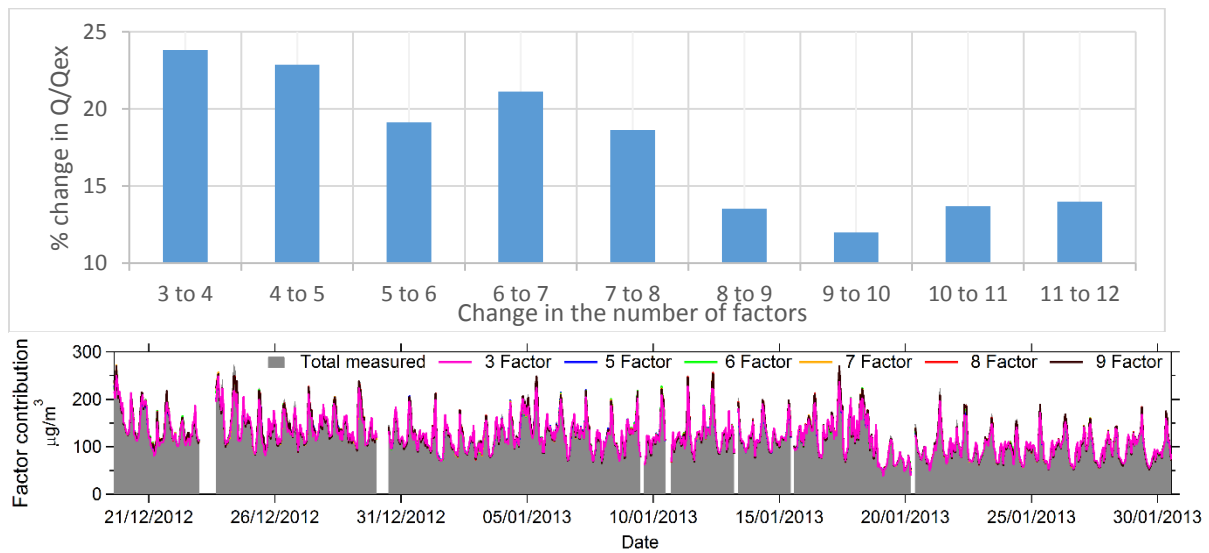

6

7

8 **Figure S2.** Relative change in the Q/Q<sub>expected</sub> ratio with change in factor number (top) and time  
9 series of the total measured VOC mass (grey filled) and the modelled VOC mass for different  
10 number of factors in the PMF solution (bottom).



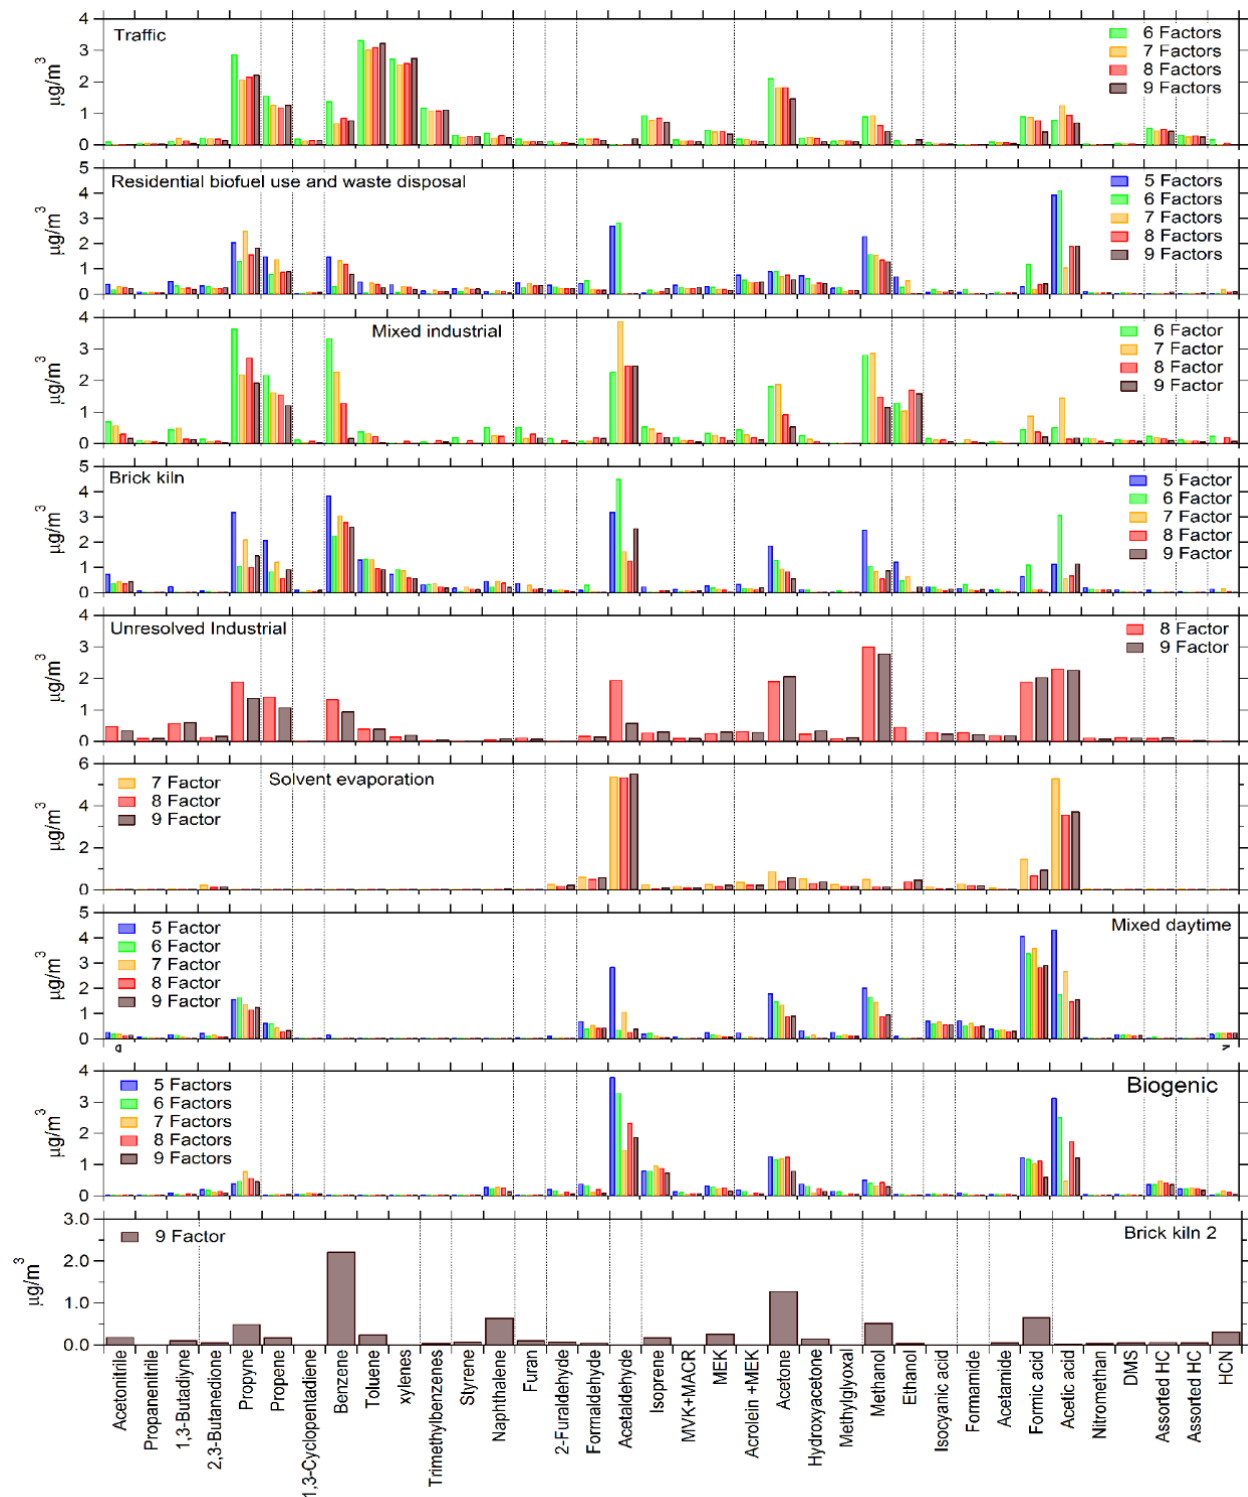

1  
 2 **Figure S3a.** Evolution of the factor profiles of the eight sources identified, and the 9<sup>th</sup> source which  
 3 is considered to arise due to splitting of the brick kiln factor, from the 5 Factor to the 9 Factor  
 4 solution.

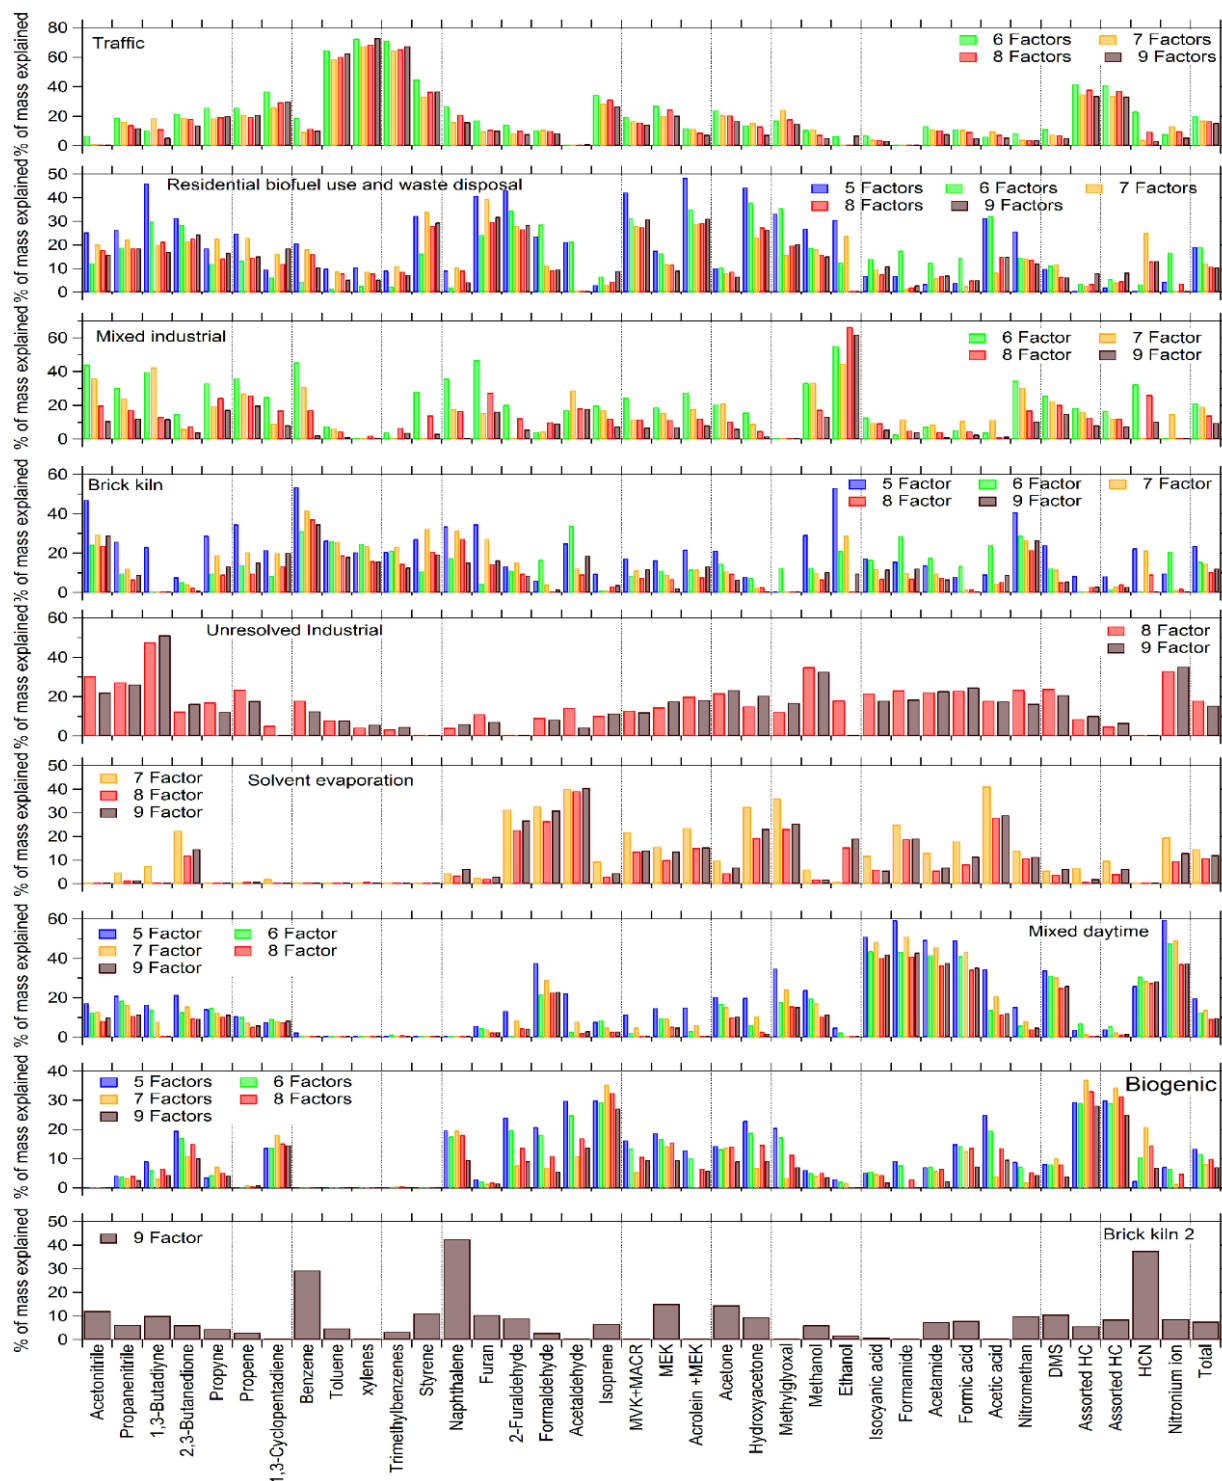

1  
 2 **Figure S3b.** Evolution of the percentage of the mass of each compound explained by the eight  
 3 sources identified, and the 9<sup>th</sup> source which is considered to arise due to splitting of the brick kiln  
 4 factor, from the 5 Factor to the 9 Factor solution.

5

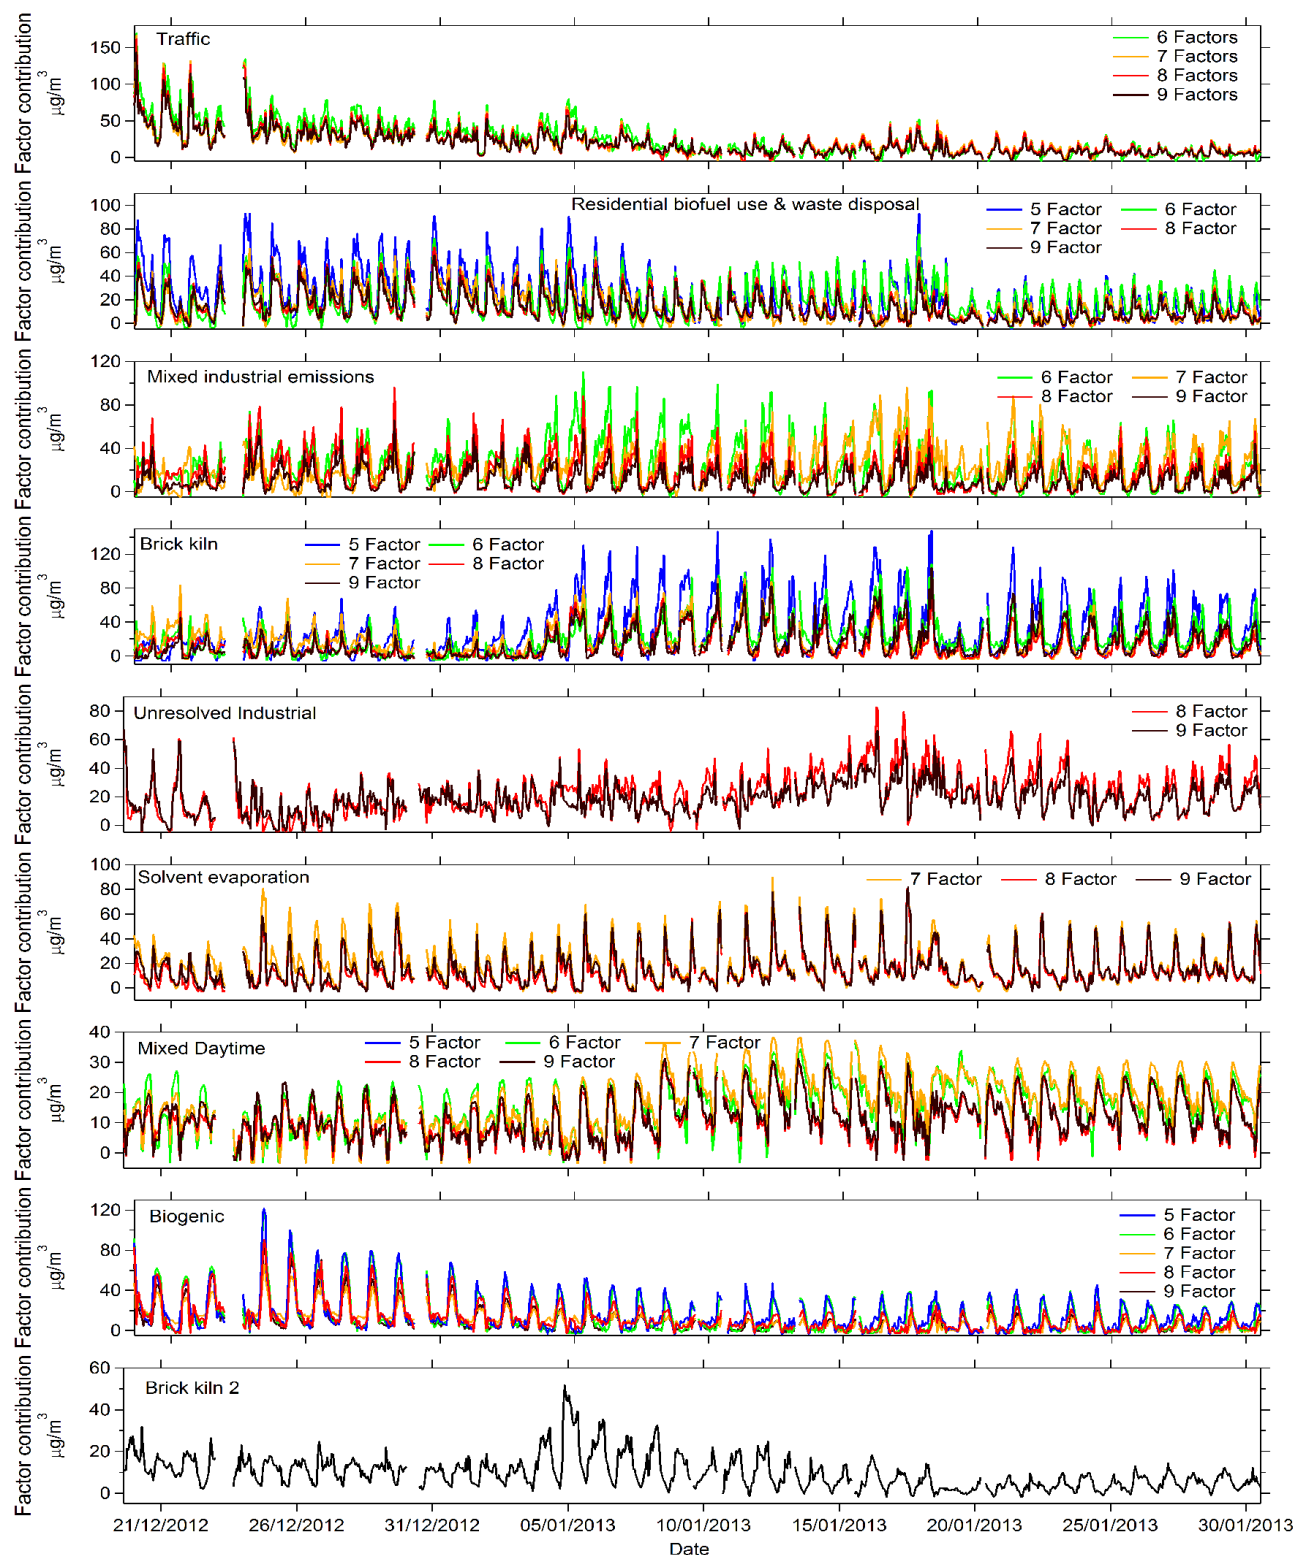

1

2 **Figure S3c** Evolution of the factor contribution of the eight sources identified, and the 9<sup>th</sup> source  
 3 which is considered to arise due to splitting of the brick kiln factor, from the 5 Factor to the 9  
 4 Factor solution.

1

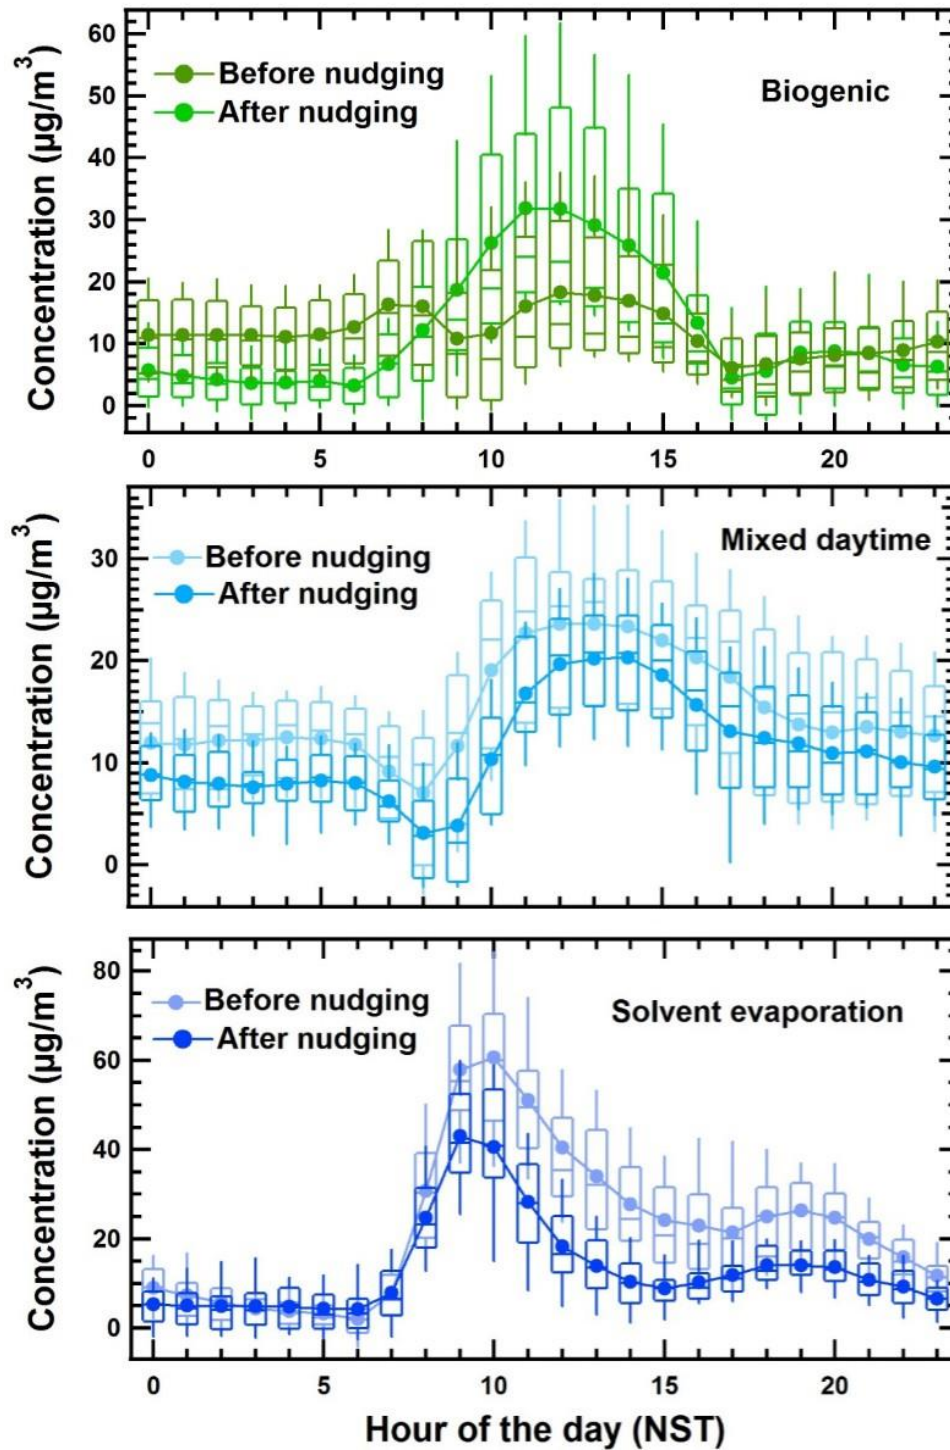

2

3 **Figure S4.** Comparison of the diel profiles of biogenic emissions, mixed daytime and solvent  
4 evaporation factors before and after nudging

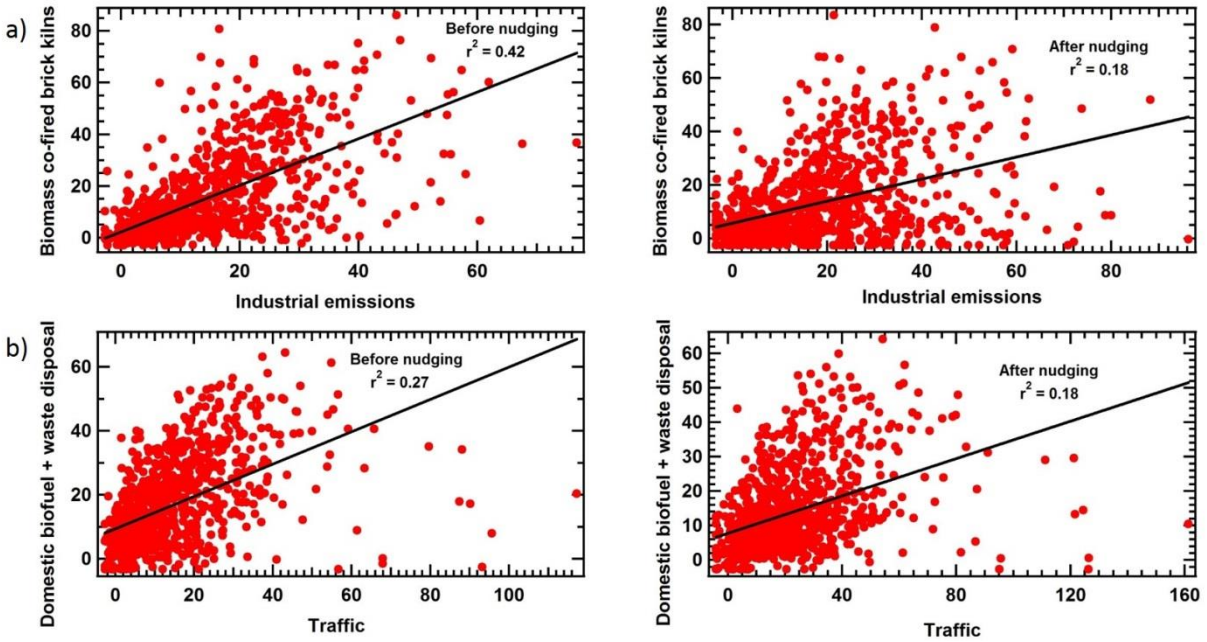

1

2 **Figure S5.** Comparison of the G-space plots between a) biomass co-fired brick kilns and mixed  
 3 industrial emissions and b) residential biofuel use and waste disposal and traffic before and after  
 4 nudging

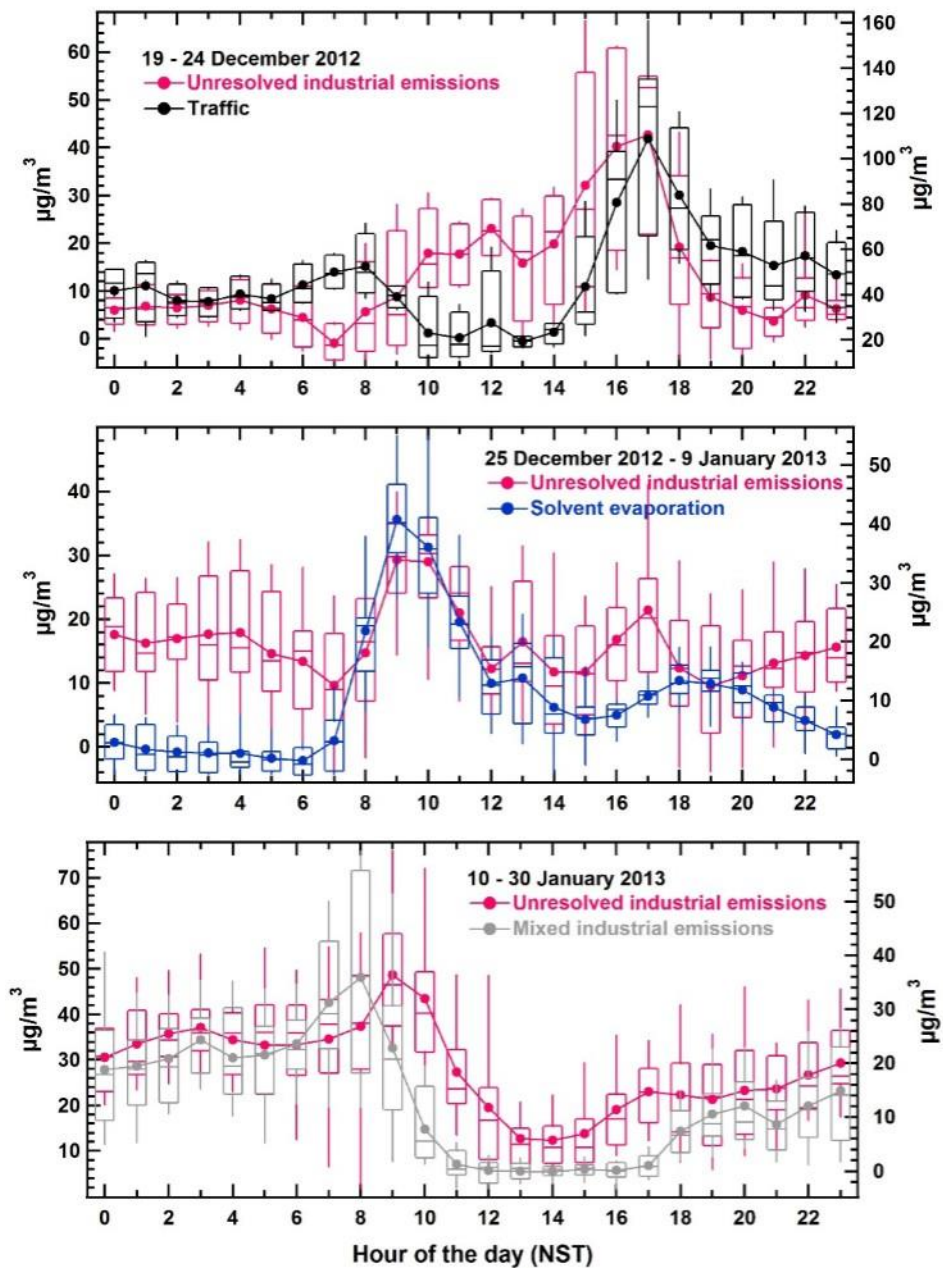

1

2 **Figure S6.** Comparison of the diel profile of the unresolved industrial emissions with that of traffic  
 3 (19 – 24 December 2012), solvent evaporation (25 December 2012 – 9 January 2013) and mixed  
 4 industrial emissions (10 – 30 January 2013)

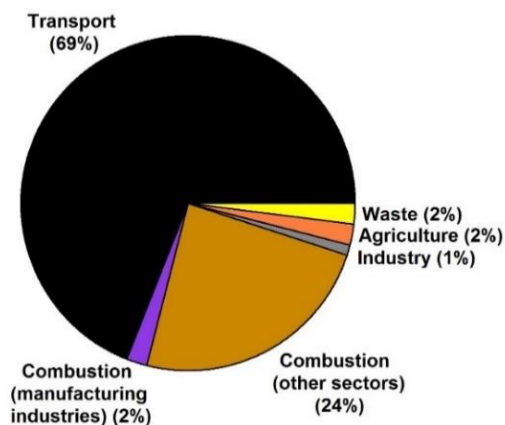

1  
2 **Figure S7.** Emissions of particulate matter (sum of PM10 and PM2.5) and CO from different  
3 sectors in Kathmandu and Lalitpur (Pradhan et al, 2012)

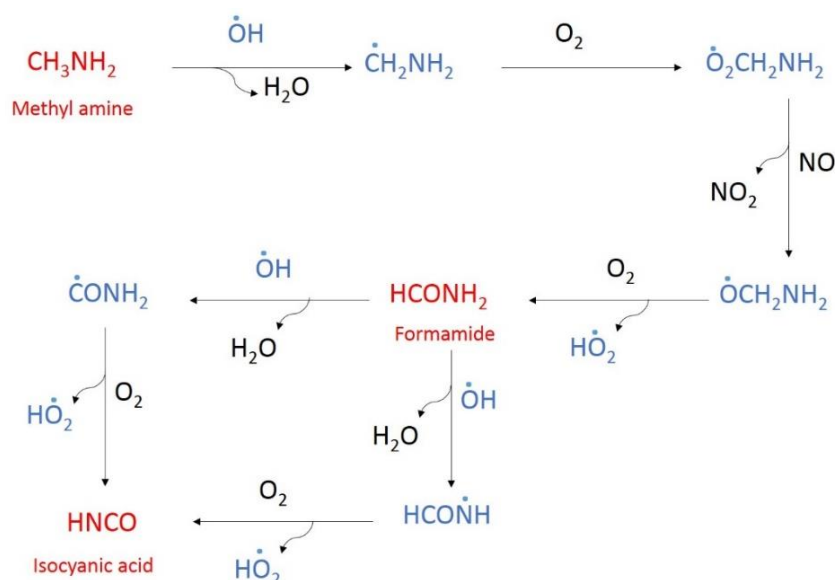

8 **Figure S8.** Reaction schematic for the formation of formamide and isocyanic acid (blue colored  
9 species represents radicals)

10 Figure S8 represents the reaction schematic of the proposed mechanism for the formation of  
11 formamide, acetamide and isocyanic acid based on the previous laboratory experiments which  
12 shows that photooxidation of alkyl amines leads to the formation of formamide and acetamide  
13 which undergoes further photooxidation to form isocyanic acid which can have severe health  
14 impact at concentration thresholds above 1 ppb (Roberts et al., 2011; Roberts et al., 2014). This  
15 study provides the first ever ambient evidence of the photochemical source of isocyanic acid by  
quantification of both the amides (the precursor) and isocyanic acid (the product) collectively and  
the source apportionment of these compounds in the Kathmandu Valley.

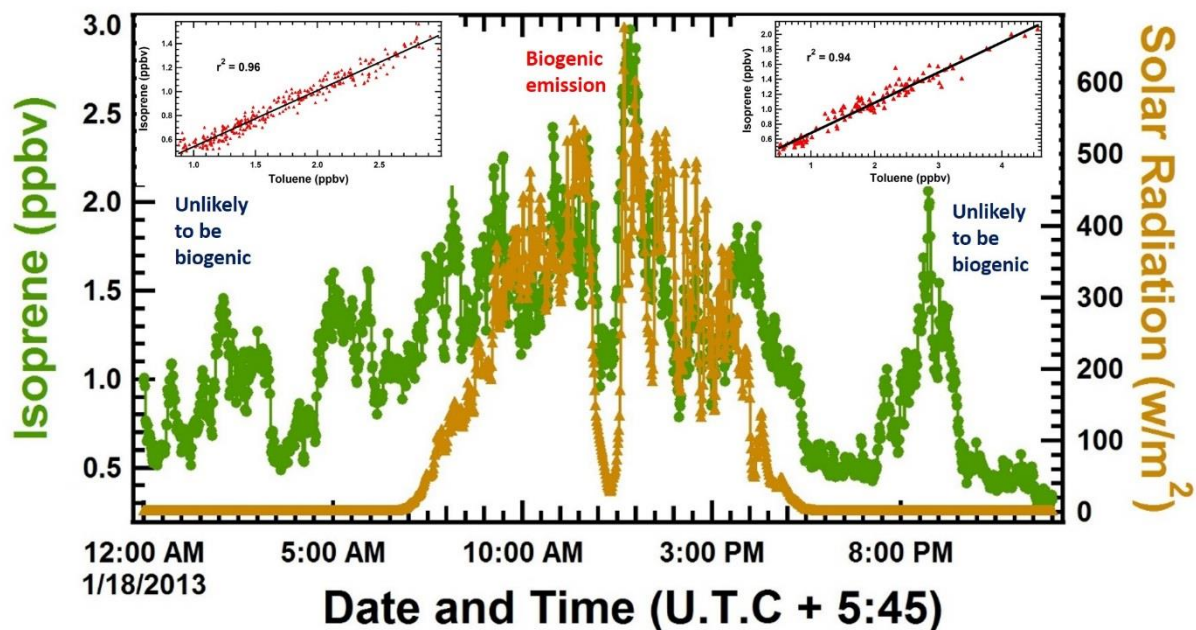

1  
 2 **Figure S9.** Shows a representative day's (18 January 2013) isoprene data against solar radiation.  
 3 It can be observed from the figure that the daytime isoprene emission correlates very nicely with  
 4 solar radiation which indicates biogenic emission while during evening hours and night time,  
 5 isoprene showed high peaks that shows excellent correlation with toluene.

6  
 7 **References**

8 Akagi, S. K., Yokelson, R. J., Burling, I. R., Meinardi, S., Simpson, I., Blake, D. R.,  
 9 McMeeking, G. R., Sullivan, A., Lee, T., Kreidenweis, S., Urbanski, S., Reardon, J.,  
 10 Griffith, D. W. T., Johnson, T. J., and Weise, D. R.: Measurements of reactive trace gases  
 11 and variable O<sub>3</sub> formation rates in some South Carolina biomass burning plumes, *Atmos.*  
 12 *Chem. Phys.*, 13, 1141-1165, 10.5194/acp-13-1141-2013, 2013.  
 13 Aoki, N., Inomata, S., Tanimoto, H.: Detection of C<sub>1</sub>–C<sub>5</sub> alkyl nitrates by proton transfer  
 14 reaction time-of-flight mass spectrometry, *International Journal of Mass Spectrometry*,  
 15 <https://doi.org/10.1016/j.ijms.2006.11.018>, 2007  
 16 de Gouw, J. A., Goldan, P. D., Warneke, C., Kuster, W. C., Roberts, J. M., Marchewka, M.,  
 17 Bertman, S. B., Pszenny, A. A. P., and Keene, W. C.: Validation of proton transfer  
 18 reaction-mass spectrometry (PTR-MS) measurements of gas-phase organic compounds in



1 the atmosphere during the New England Air Quality Study (NEAQS) in 2002, *Journal of*  
2 *Geophysical Research-Atmosphere*, 108, 10.1029/2003jd003863, 2003.

3 Inomata, S., Tanimoto, H., Kato, S., Suthawaree, J., Kanaya, Y., Pochanart, P., Liu, Y., and  
4 Wang, Z.: PTR-MS measurements of non-methane volatile organic compounds during an  
5 intensive field campaign at the summit of Mount Tai, China, in June 2006, *Atmos. Chem.*  
6 *Phys.*, 10, 7085-7099, doi:10.5194/acp-10-7085-2010, 2010.

7 Karl, T., Jobson, T., Kuster, W. C., Williams, E., Stutz, J., Shetter, R., Hall, S. R., Goldan, P.,  
8 Fehsenfeld, F., and Lindinger, W.: Use of proton-transfer-reaction mass spectrometry to  
9 characterize volatile organic compound sources at the La Porte super site during the  
10 Texas Air Quality Study 2000, *Journal of Geophysical Research: Atmospheres*, 108,  
11 4508, 10.1029/2002jd003333, 2003.

12 Roberts, J. M., Veres, P. R., Cochran, A. K., Warneke, C., Burling, I. R., Yokelson, R. J., Lerner,  
13 B., Gilman, J. B., Kuster, W. C., Fall, R., and de Gouw, J.: Isocyanic acid in the  
14 atmosphere and its possible link to smoke-related health effects, *Proceedings of the*  
15 *National Academy of Sciences*, 10.1073/pnas.1103352108, 2011.

16 Roberts, J. M., Veres, P., VandenBoer, T. C., Warneke, C., Graus, M., Williams, E. J., Lefer, B.  
17 L., Brock, C. A., Bahreini, R., Öztürk, F., Middlebrook, A. M., Wagner, N. L., Dubé, W.  
18 P. a., and de Gouw, J. A.: New insights into atmospheric sources and sinks of isocyanic  
19 acid, HNCO, from recent urban and regional observations, *Journal of Geophysical*  
20 *Research: Atmospheres*, 119, 1060–1072, 10.1002/2013JD019931, 2014.

21 Seco, R., Peñuelas, J., Filella, I., Llusà, J., Molowny-Horas, R., Schallhart, S., Metzger, A.,  
22 Müller, M., and Hansel, A.: Contrasting winter and summer VOC mixing ratios at a  
23 forest site in the Western Mediterranean Basin: the effect of local biogenic emissions,  
24 *Atmos. Chem. Phys.*, 11, 13161-13179, 10.5194/acp-11-13161-2011, 2011.

25 Stockwell, C. E., Veres, P. R., Williams, J., and Yokelson, R. J.: Characterization of biomass  
26 burning emissions from cooking fires, peat, crop residue, and other fuels with high-  
27 resolution proton-transfer-reaction time-of-flight mass spectrometry, *Atmos. Chem.*  
28 *Phys.*, 15, 845-865, 10.5194/acp-15-845-2015, 2015.

29 Warneke, C., Roberts, J. M., Veres, P., Gilman, J., Kuster, W. C., Burling, I., Yokelson, R., and  
30 de Gouw, J. A.: VOC identification and inter-comparison from laboratory biomass

1 burning using PTR-MS and PIT-MS, International Journal of Mass Spectrometry, 303, 6-  
2 14, <http://dx.doi.org/10.1016/j.ijms.2010.12.002>, 2011.  
3
